# Supplementary material for: Student Preferences Impact Outcome of Flipped Classroom in Dental Education: Students Favoring Flipped Classroom Benefited More
Source: MDPI journal article supplement (doi:10.3390/educsci11040150), 2021-03-28
Supplement: s1 [file s1]

## **Supplementary Table S1. ANS Flipped Classroom Module Survey**

1. How much time did you spend watching the VoiceThread video online?
  - A. less than 1 hour
  - B. 1-2 hours
  - C. more than 2 hours
  - D. I did not watch the video
  
2. How much time did you spend on the assignment?
  - A. less than 1 hour
  - B. 1-2 hours
  - C. more than 2 hours
  - D. I did not do the assignment
  
3. How much of the content do you feel you understand after watching the VoiceThread video online?
  - A. less than 25%
  - B. 25-50%
  - C. 50%-75%
  - D. 75%-100%
  - E. I did not watch the video
  
4. How much of the content do you feel you understand after finishing the assignment?
  - A. less than 25%
  - B. 25-50%
  - C. 50%-75%
  - D. 75%-100%
  - E. I did not do the assignment
  
5. Based on the amount of time you spent on the ANS Flipped-class module, did your score in Quiz 2 meet your expectation?
  - A. Lower than expected
  - B. Higher than expected

- C. As expected
- D. I did not have any expectation

6. How many flipped-classroom modules would you like to have in physiology?

- A. None
- B. One is enough
- C. One per quarter (Three)
- D. As many as possible
- E. It does not matter to me

7. What did you like the most about the learning experience in the module?

8. What did you like the least about the learning experience in the module?

9. How can we improve the ANS module? Please limit to three, one would suffice.
